# Supplementary material for: Current tools available for investigating vaccine hesitancy: a scoping review protocol
Source: PubMed Central journal article supplement — BMJ Open. 2019 Dec 11;9(12):e033245. doi: 10.1136/bmjopen-2019-033245 (PMC6924801; doi:10.1136/bmjopen-2019-033245), 2019-12-11

# BMJ Open

BMJ Open is committed to open peer review. As part of this commitment we make the peer review history of every article we publish publicly available.

When an article is published we post the peer reviewers' comments and the authors' responses online. We also post the versions of the paper that were used during peer review. These are the versions that the peer review comments apply to.

The versions of the paper that follow are the versions that were submitted during the peer review process. They are not the versions of record or the final published versions. They should not be cited or distributed as the published version of this manuscript.

BMJ Open is an open access journal and the full, final, typeset and author-corrected version of record of the manuscript is available on our site with no access controls, subscription charges or pay-per-view fees (<http://bmjopen.bmj.com>).

If you have any questions on BMJ Open's open peer review process please email [info.bmjopen@bmj.com](mailto:info.bmjopen@bmj.com)

# BMJ Open

## Current tools available for investigating vaccine hesitancy: a scoping review protocol

|                               |                                                                                                                                                                                                                                                                                                                                                                                                                                                                                                                                                                                                          |
|-------------------------------|----------------------------------------------------------------------------------------------------------------------------------------------------------------------------------------------------------------------------------------------------------------------------------------------------------------------------------------------------------------------------------------------------------------------------------------------------------------------------------------------------------------------------------------------------------------------------------------------------------|
| Journal:                      | <i>BMJ Open</i>                                                                                                                                                                                                                                                                                                                                                                                                                                                                                                                                                                                          |
| Manuscript ID                 | bmjopen-2019-033245                                                                                                                                                                                                                                                                                                                                                                                                                                                                                                                                                                                      |
| Article Type:                 | Protocol                                                                                                                                                                                                                                                                                                                                                                                                                                                                                                                                                                                                 |
| Date Submitted by the Author: | 26-Jul-2019                                                                                                                                                                                                                                                                                                                                                                                                                                                                                                                                                                                              |
| Complete List of Authors:     | Oduwole, Elizabeth; University of Stellenbosch Department of Interdisciplinary Health Sciences, Global Health; Cochrane South Africa, South African Medical Research Council<br>Pienaar, Elizabeth; Medical Research Council, South African Cochrane Centre<br>Mahomed, Hassan; University of Stellenbosch Department of Interdisciplinary Health Sciences, Global Health<br>Wiysonge, Charles; South African Medical Research Council, Cochrane South Africa; Stellenbosch University, Division of Epidemiology and Biostatistics, Department of Global Health, Faculty of Medicine and Health Sciences |
| Keywords:                     | Vaccine hesitancy, Immunization, Vaccination, Tools, Scoping reviews                                                                                                                                                                                                                                                                                                                                                                                                                                                                                                                                     |
|                               |                                                                                                                                                                                                                                                                                                                                                                                                                                                                                                                                                                                                          |

SCHOLARONE™  
Manuscripts

# Current tools available for investigating vaccine hesitancy: a scoping review protocol

Elizabeth O. Oduwole<sup>1, 2</sup>, Elizabeth D. Pienaar<sup>2</sup>, Hassan Mahomed<sup>1</sup>, Charles S Wiysonge<sup>2,3</sup>

<sup>1</sup> Division of Health Systems and Public Health, Department of Global Health, Faculty of Medicine and Health Sciences, Stellenbosch University, Cape Town, South Africa

<sup>2</sup> Cochrane South Africa, South African Medical Research Council, Cape Town, South Africa

<sup>3</sup> Division of Epidemiology and Biostatistics, Department of Global Health, Faculty of Medicine and Health Sciences, Stellenbosch University, Cape Town, South Africa

## Email addresses of authors:

Elizabeth O. Oduwole: [oduwoleelizabeth@gmail.com](mailto:oduwoleelizabeth@gmail.com); [oduwole@sun.ac.za](mailto:oduwole@sun.ac.za);

Elizabeth D. Pienaar: [Elizabeth.Pienaar@mrc.ac.za](mailto:Elizabeth.Pienaar@mrc.ac.za);

Hassan Mahomed: [hmahomed@sun.ac.za](mailto:hmahomed@sun.ac.za);

Charles S. Wiysonge: [Charles.Wiysonge@mrc.ac.za](mailto:Charles.Wiysonge@mrc.ac.za)

## Corresponding author

Elizabeth O. Oduwole

Physical address: Division of Health Systems and Public Health, Department of Global Health, Faculty of Medicine and Health Sciences, Stellenbosch University, Francie Van Zijl Drive, Tygerberg, 7505 Cape Town, South Africa

Email address: [oduwoleelizabeth@gmail.com](mailto:oduwoleelizabeth@gmail.com); [oduwole@sun.ac.za](mailto:oduwole@sun.ac.za)

**Word count: 3, 669**

## ABSTRACT

### Introduction

Vaccine hesitancy, defined as the delay in acceptance or refusal of vaccination despite availability of vaccination services is responsible in part for suboptimal levels of vaccination coverage worldwide. The WHO recommends that countries incorporate plans to measure and address vaccine hesitancy into their immunization programmes. This requires that governments and health institutions be able to detect concerns about vaccination in the population and monitor changes in vaccination behaviours. To do this effectively, tools to detect and measure vaccine hesitancy are required. The purpose of this scoping review is to give a broad overview of currently available vaccine hesitancy measuring tools and present a summary of their nature, similarities and differences.

### Methods and analysis

The review will be conducted using the framework for scoping review proffered by Arksey and O'Malley. It will comply with the Preferred Reporting Items for Systematic reviews and Meta-Analyses extension for Scoping Reviews' guidelines. The broader research question of this review is: what vaccine hesitancy measuring tools are currently available?

Search strategies will be developed using controlled vocabulary and selected keywords. PubMed, Web of Science, Scopus, and reference lists of relevant publications will be searched. Titles and abstracts will be independently screened by two authors and data from full-text articles meeting the inclusion criteria will be extracted independently by two authors using a pre-tested data charting form. Discrepancies will be resolved by discussion and consensus. Results will be presented using descriptive statistics such as percentages, tables, charts and flow diagrams as appropriate. Narrative analysis will be used to summarize the findings of the review.

### Ethics and dissemination

Ethics approval is not required for the review. It will be submitted as part of a doctoral thesis, presented at conferences and published in a peer-reviewed journal.

**Registration:** <https://osf.io/x8fjk/>

## ARTICLE SUMMARY

### Strengths and limitations of this study

- The review will bring to the fore gaps that exists in the area of contextual development and validation of vaccine hesitancy measuring tools.
- The prescriptive study selection criteria will broaden the scope of included literature.
- Compliance with the PRISMA-ScR will enable the review to be one of its earliest use and test of impact.
- No meta-analysis is planned for this scoping review.

**Key words:** vaccine hesitancy, immunization, vaccination, tools, scoping review

## INTRODUCTION

The significant contributions of vaccination to the health and general wellbeing of the human race cannot be overemphasised. The drastic reduction in the mortality, morbidity, and disability rates due to Vaccine Preventable Diseases (VPDs) worldwide since its introduction are great testimonials to the efficacy of vaccination. It has been estimated that over 3 million deaths and 75 thousand disabilities are prevented annually by vaccination.[1] This makes it one of the most successful public health interventions of modern times.[2] The progress made in vaccination coverage over the years was further accentuated and accelerated by the introduction of the World Health Organisation's (WHO) Expanded Programme on Immunization (EPI) in 1974.[3] EPI is a resounding success in most parts of the world. The global immunization coverage (indicated by the percentage of children who has received the third dose of diphtheria, tetanus and pertussis vaccine (DTP3)[4, 5] is estimated at 86% in 2015 according to WHO and UNICEF (United Nations International Children's Emergency Funds) data on global immunization. This coverage is said to have been sustained above 85% since the year 2010.[6] To continue to be a public health success, vaccines needs to be accepted and trusted by its target populace, and broadly and adequately used.[7]

### **The global challenge of vaccine hesitancy**

The estimates reported above are calculated using the official national immunization coverage figures reported to WHO-UNICEF by member states.[4] They however, falls short of the Global Vaccine Action Plan's (GVAP's) target of 90% coverage at national level and 80% coverage at district levels for the Decade of Vaccines, that is, 2011-2020.[6, 8] Moreover, national coverage levels have been known to 'mask' variations within countries, concealing clusters of sub-national geographical or sociological areas where coverage is much lower.[5, 6] These areas with low or suboptimal vaccination coverage have provided fertile breeding grounds for intermittent outbreaks of vaccine preventable diseases in various parts of the world, including developed and developing countries.[9-11] These outbreaks have been attributed, in part, to the delay or outright refusal of some members of the population to vaccinate themselves or their children even when such services are available.

This phenomenon, that is, the delay in acceptance or refusal of vaccination despite availability of vaccination services, is defined as vaccine hesitancy.[12] Vaccine hesitancy is complex and context specific, and varies across time, place and vaccines.[12, 13] It can be described on a

1  
2 continuum ranging from those who accept all vaccines without any doubt to those who reject  
3 all without any doubt. The large, heterogeneous group of individuals between these two  
4 extremes exhibits varying degrees of ‘hesitancy’.[12] Vaccine hesitancy thus reflects the  
5 client’s disposition towards vaccination as opposed to health system factors which impede  
6 vaccine uptake. Consequently, vaccine hesitancy shifts focus from the well-researched  
7 “supply” side of vaccination to the relatively under-studied “demand” side of vaccination,  
8 exploring people’s willingness to accept vaccination for themselves or their children when  
9 supply and access are available. The extreme expression of vaccine hesitancy; vaccine refusal,  
10 is as old as the advent of vaccination itself.[9, 14, 15] Evidence suggests that it has become  
11 more pronounced on the global vaccination landscape in recent years, aided amongst other  
12 things by the increasing advancement in Information and Communication Technologies  
13 (ICTs).[3, 14]

22  
23 Many of the countries in the world contend with vaccine hesitancy, with well over 90% of  
24 the 194 member states of the WHO reporting it over three years as against less than the 10%  
25 that reported “no hesitancy”. [16] The three year (2015-2017) analysis of WHO/UNICEF  
26 member state Joint Reporting Form (JRF) by Sarah Lane and her team also revealed that  
27 vaccine hesitancy is present in all the six WHO regions, and it cuts across all the four  
28 categories of country income levels as classified by the WHO. These are: low, lower middle,  
29 upper middle and high income category.[16] On country level, vaccine hesitancy has been  
30 identified in urban and rural dwellers,[17] as well as amongst people of low literacy and those  
31 of high literacy[18, 19] howbeit for different reasons which are beyond the scope of this  
32 review protocol to elucidate. There are documented evidence that shows that vaccine  
33 hesitancy is present amongst adherents of the two major religions of the world[20] and is not  
34 limited to either gender.[21, 22]

### 44 **Determinants of vaccine hesitancy**

45  
46  
47 Determinants of vaccine hesitancy can also be referred to as factors, reasons or causes of  
48 vaccine hesitancy. According to the WHO’s Strategic Advisory Group of Experts on  
49 Immunization (SAGE) Working Group (WG) on vaccine hesitancy report of 2014,[23] there  
50 are myriads of factors that influences the vaccine decision-making process. This is not  
51 surprising given its complex and context specific nature. They proffered two models of  
52 vaccine hesitancy determinants; the 3C model which is a succinct, easy-to-grasp model  
53  
54  
55  
56  
57

1  
2 comprising of three determinants of vaccine hesitancy all starting with the letter 'C', and the  
3 more detailed, Working Group Determinants of Vaccine Hesitancy Matrix.[12, 23, 24]  
4

5  
6 In the 3C model, the determinants of vaccine hesitancy are identified as: **Confidence**, which  
7 covers issues of trust, not only in safety and effectiveness of vaccines, but also in the  
8 competence of the health care professionals that administer them and the health care systems  
9 that delivers them, as well as in the motives of the policy makers who proposes them.  
10  
11 **Convenience** involves the ease or otherwise at which the vaccines and related services are  
12 accessed, their affordability and the willingness of the individuals to pay. And **Complacency**,  
13 which occurs when the need to vaccinate is low because the perceived risk of vaccine  
14 preventable diseases are deemed to be low. Complacency is particularly heightened in  
15 situations where other competing health or life responsibilities are present. These tend to  
16 dwarf the need for vaccination which is seen as a preventive measure against diseases, many  
17 of which are no longer common or seen as life-threatening, ironically, due to the successes of  
18 previous vaccination endeavours.[12, 23]  
19  
20  
21  
22  
23  
24  
25  
26

27 In recent years, additional two 'Cs' has been proposed to expand the '3C' model to a '5C'  
28 model. These are rational **Calculation** in which individuals with no strongly defined  
29 vaccination attitude embark on an intensive search for information, and depending on their  
30 findings, asses the risk of vaccination and makes a decision (usually a subjective one) either  
31 to vaccinate or not to vaccinate. **Collective** responsibility, on the other hand is implied when  
32 individuals or sub-groups makes vaccine decisions based on their sense of social  
33 responsibility. Such may decide to vaccinate themselves to protect others. For example,  
34 pregnant women deciding to take pertussis vaccines based on their understanding that the  
35 protection it offers is not for themselves but for their unborn babies.[13, 25, 26]  
36  
37  
38  
39  
40  
41  
42  
43

44 The second model, the Working Group Determinants of Vaccine Hesitancy Matrix is more  
45 complex and detailed than the 3C model as earlier mentioned, it broadly groups the  
46 determinants under three categories. The first is **Contextual influences**, the second,  
47 **Individual and group influences** and the third, **Vaccine and vaccination-specific issues**.  
48 Each of these categories has a number of factors listed under them that gives more details  
49 about the determinant and its scope.[24] Knowing the determinants of vaccine hesitancy in a  
50 particular context and setting allows for targeted interventions to be developed purposely to  
51 combat its effect in that particular context and setting; as not all intervention works in all  
52  
53  
54  
55  
56  
57  
58  
59  
60



1 settings at all times and for all vaccines. Most of the interventions to mitigate against vaccine  
2 hesitancy and its effects have been designed and tested in High Income Countries (HICs), with  
3 precious little documented in Low and Middle Income Countries (LMICs), especially in Sub-  
4 Saharan Africa.  
5  
6  
7

### 9 **Effects of vaccine hesitancy**

11 The effects of vaccine hesitancy, that is, the delay or refusal of vaccination for one's self or  
12 ones' dependant(s) despite the availability and offer of such services can be grave and far-  
13 reaching. Vaccine hesitancy is known to have a negative effect on vaccine demand, which in  
14 turn affects vaccine uptake and consequently the level of coverage needed to contain outbreaks  
15 and maintain control of vaccine preventable diseases. Ultimately, this undermines the  
16 effectiveness and successes of immunization programs.[9]  
17  
18  
19  
20  
21  
22

23 Vaccine hesitancy does not only pose a danger to the hesitant or vaccine-refusing individuals  
24 and / or their dependants, but also to the larger society. Vaccine hesitancy reduces 'herd  
25 immunity', that is, the level at which immunization coverage is to be maintained if protection  
26 is to be offered to those too young (for example, neonates) or too sick (the  
27 immunocompromised) to be immunized.[27] These sub-group of people depend on the  
28 immunization of other people in their community to protect them from contacting some  
29 vaccine preventable diseases. The level of coverage required for herd immunity in a  
30 community to prevent an outbreak of measles is estimated at 95%. If there is a reduction in  
31 this level for a sustained period of time in a community, an outbreak measles is imminent in  
32 such a community.  
33  
34  
35  
36  
37  
38  
39

40 Controversies based on quasi 'scientific' claims such as the one ignited by the infamous  
41 Wakefield study conducted in the UK, which suggested a direct link between the Measles,  
42 Mumps and Rubella (MMR) vaccine and Autism, resulted in wide spread vaccine hesitancy  
43 and consequent negative effects. One of such effects is the erosion of confidence in the safety  
44 of vaccines, particularly the MMR vaccine, leading to marked decrease in vaccination levels  
45 and outbreaks of measles in the UK,[28] some parts of Europe such as Austria, Germany and  
46 France,[13] and the United States.[29] Another unfortunate example of the effect of vaccine  
47 hesitancy is demonstrated in the fivefold increase in the incidence of polio cases in Nigeria  
48 between 2002 -2006. This was caused by the boycott of the Oral Polio Vaccine (OPV), due to  
49 controversies emanating from unfounded rumours and distrust in the government.[25]  
50  
51  
52  
53  
54  
55  
56  
57  
58  
59  
60

1  
2 A lot of countries battle with the effects of vaccine hesitancy, the global influence of which  
3 prompted the WHO to recommend that it or its proxies should be constantly monitored. This  
4 necessitates the development of tools to detect and measure vaccine hesitancy.[12]  
5  
6

### 7 **Measures of vaccine hesitancy**

8  
9  
10 The menace of vaccine hesitancy and its attendant undesirable effects are a threat to public  
11 health globally. Its complex and context specific nature, and variability across time, place and  
12 vaccines makes its detection and measure somewhat challenging. There had been several  
13 efforts in recent past to develop tools for the detection and measures of vaccine hesitancy,  
14 such as Parent Attitudes about Childhood Vaccines Survey (PACV),[30] Vaccine Confidence  
15 Scale (VCS),[31, 32] Global Vaccine Confidence Index (GVCI)[19] and Vaccine Hesitancy  
16 Scale (VHS).[33] Most were developed for used in High Income Countries (HIC), and some,  
17 like the VHS has been validated and used in such context and settings.[33] Whilst  
18 acknowledging the work of Wallace *et al*,[34] who recently developed and validated a tool;  
19 the Caregiver Vaccine Acceptance Scale (CVAS) in Ghana, a Low and Middle Income  
20 County (LMIC) in sub-Saharan Africa, there is, nevertheless a dearth of such context specific  
21 tools to measure vaccine hesitancy in many other sub-Saharan LMIC context and settings.  
22 Hence there is a need for deliberate and concerted effort to fill this existing knowledge gap.  
23 As imperative this need is; care must be taken in executing this mandate to ensure that such  
24 generated tools are not just context-specific and valid, but can also provide a basis for data  
25 comparison with, and possible integration with those generated in other parts of the world.  
26 This can only be possible if similar templates are adapted and used in the development of such  
27 tools. This seems to be an implicit rationale behind the SAGE working group on vaccine  
28 hesitancy's' recommendation #1 in their full report of 2014 to WHO member states. The  
29 recommendation states that member states should “incorporate a plan to measure and address  
30 vaccine hesitancy into their country's immunization program as part of good program  
31 practices; the compendium of vaccine hesitancy survey questions may help; use of questions  
32 from the compendium facilitates inter-country comparisons, though the survey questions still  
33 remain to be validated throughout different settings”.[23] This is exemplified in the effort of  
34 Wallace and his team,[34] and is the main thrust of the research project which the scoping  
35 review subsequent to this protocol aims to address. The crux of the project is to develop a  
36 context-specific validated tool in a sub-Saharan LMIC setting based on the compendium of  
37 vaccine hesitancy survey questions developed by Larson and her team in 2015[35]  
38  
39  
40  
41  
42  
43  
44  
45  
46  
47  
48  
49  
50  
51  
52  
53  
54  
55  
56  
57  
58  
59  
60

1  
2 commissioned by the WHO. The use of the compendium questions is expected to facilitate  
3 inter-country comparisons when validated in different settings as stated in the  
4 recommendation.  
5  
6

## 7 8 **METHODS AND ANALYSIS** 9

10 The use of scoping reviews, especially in health and related fields, has steadily been on the  
11 rise since 2012.[36, 37] Scoping reviews are used to identify research gaps, map key concepts  
12 and identify main sources of evidence available in a particular area of research.[38, 39] A  
13 Scoping review is particularly useful when the area of research is a complex and  
14 heterogeneous one,[39] such as vaccine hesitancy. The complex and contextual nature of  
15 vaccine hesitancy, and its variation across time, place and vaccines makes scoping review an  
16 ideal tool for its investigation. Also, the usability of scoping reviews to capture the breadth of  
17 evidence available on a particular area of research is in alignment with the aim of this scoping  
18 review. The aim of the scoping review subsequent to this protocol is to give a broad overview  
19 of currently available vaccine hesitancy measuring tools, and present a summary of their  
20 nature, similarities and differences.  
21  
22  
23  
24  
25  
26  
27  
28

29 The scoping review will utilise the Askey and O'Malley framework for conducting scoping  
30 reviews.[38] It will incorporate suggested improvements and recommendations by other  
31 authors such as Levac,[40] Pham[36] and the Joanna Briggs Institute's (JBI) manual for  
32 review authors[41] where appropriate. The JBI's manual for review authors stipulates the use  
33 of an a-priori protocol for scoping reviews, it also recommends that the inclusion and  
34 exclusion criteria for such reviews should clearly relate to the objectives and research  
35 questions of such reviews. This protocol is in compliance with this stipulation, and the scoping  
36 review will adopt the recommendations in the process of its conduct. The mandatory five  
37 stages of the six stage steps of the Askey and O'Malley framework will be utilised in the  
38 conduct of this scoping review, with the optional sixth stage not included. The six stages are:  
39  
40  
41  
42  
43  
44  
45  
46

- 47 1. Identifying a research question;
- 48 2. Identifying relevant studies
- 49 3. Study selection
- 50 4. Charting the data
- 51
- 52
- 53
- 54
- 55
- 56
- 57
- 58
- 59
- 60

- 1
  - 2
  - 3
  - 4
  - 5
  - 6
  - 7
  - 8
  - 9
  - 10
  - 11
  - 12
  - 13
  - 14
  - 15
  - 16
  - 17
  - 18
  - 19
  - 20
  - 21
  - 22
  - 23
  - 24
  - 25
  - 26
  - 27
  - 28
  - 29
  - 30
  - 31
  - 32
  - 33
  - 34
  - 35
  - 36
  - 37
  - 38
  - 39
  - 40
  - 41
  - 42
  - 43
  - 44
  - 45
  - 46
  - 47
  - 48
  - 49
  - 50
  - 51
  - 52
  - 53
  - 54
  - 55
  - 56
  - 57
  - 58
  - 59
  - 60
5. Collating, summarizing and reporting the result
  6. Consultation exercise (optional step)

The sixth stage, the consultation stage, is an optional stage, though Askey and O'Malley alluded to its inclusion enhancing their scoping review.[38] The objective of this particular scoping review does not require a consultation stage.

### **Stage 1: Identifying a research question**

The research question for the scoping review is an off-shoot of the broader research question for the project of which the scoping review forms part of the evidence synthesis phase. The research question is clearly articulated and focused as recommended by Levac and the JBI's manual for review authors,[40,41] and the scope of the review is indicated in the question. The review question is: **What vaccine hesitancy measuring tools are currently available?** The phrase "currently available" for the purpose of this scoping review refers to tools published in peer-reviewed journals available in the public domain from the year 2010 to date. This period includes the first nine years of the decade of vaccines which spans 2011-20.[8] Most of the tools in use were developed within this time frame, the few that might be before this period would have had their essence captured in their successors, as using an existing tool as the template for the development of a new one is a consistent method of tool development. This further clarification of the research question will also help in the development of an effective search strategy, and aid in the selection of the inclusion and exclusion criteria of retrieved records.

### **Stage 2: Identifying relevant studies**

Several bibliographic databases of peer reviewed journals will be searched, these will include, but will not be limited to; MEDLINE (PubMed), Web of Science and Scopus. The three-step search strategy recommended by the Joanna Briggs Institute's (JBI) manual for review authors[41] will be carried out in this stage. The first step includes the use of broad search terms to interrogate at least two electronic databases to retrieve relevant articles. Table 1 lists the proposed search strategy to be used to search MEDLINE. This strategy will be tailored for the other databases. The title and abstract of selected articles from this initial broad search will be scanned for key words and index terms used to describe the articles. In the second step, the key words and index terms identified in the first step will be used to develop

comprehensive search strategies (search strings) using controlled vocabulary and text words. The focused search strategy, reflective of the research question, will include the use of major key words such as tools, surveys, scales, interviews and questionnaires in conjunction with the main search term ‘vaccine hesitancy’ and its variants. The search strategy will be tailored to the specifications of each of databases searched. The third and final step will include the “hand-searching” of selected relevant records to ensure comprehensive coverage of relevant and available literature. Two or more authors including a seasoned evidence synthesis researcher will be involved in this three-step search for relevant records, this process ensures the optimization of the search strategy, and will lay a solid foundation for the determination of the inclusion and exclusion criteria as well as the subsequent stages.

Table 1: Proposed search strategy to search MEDLINE (PubMed)

|    | Search terms                                                                                                                                                                                                                                                                                                                                  |
|----|-----------------------------------------------------------------------------------------------------------------------------------------------------------------------------------------------------------------------------------------------------------------------------------------------------------------------------------------------|
| #1 | (Vaccination Refusal) OR (Vaccine refusal) OR (Anti Vaccination Movement) OR (Vaccine hesitant) OR (vaccination hesitant) OR (Vaccine hesitancy) OR (vaccination hesitancy) OR (immunization hesitancy) OR (immunization hesitant) OR (immunization refusal) OR (immunisation hesitancy) OR (immunisation hesitant) OR (immunisation refusal) |
| #2 | "Pro-vaccination" OR "Vaccination acceptance" OR "vaccine acceptance" OR "Immunization acceptance" OR "Pro-vaccine" OR "Vaccine confidence" OR "Vaccination confidence"                                                                                                                                                                       |
| #3 | #1 OR #2                                                                                                                                                                                                                                                                                                                                      |
| #4 | "measurement tools" OR Surveys OR Questionnaire OR Questionnaires OR Interviews OR tool OR tools OR measure OR measures OR measurements OR survey OR interview                                                                                                                                                                                |
| #5 | #3 AND #4                                                                                                                                                                                                                                                                                                                                     |

**Inclusion and exclusion criteria:** All relevant studies recovered from the comprehensive search irrespective of the language, study design, country of origin, purpose, target populace and vaccines covered will be included. Though the search strategy will be filtered to focus on studies available from the year 2010 as earlier indicated, it will also be expanded to include

1 relevant studies that may be available before that time period, and any retrieved record will  
2 be reported. Efforts will be made to contact authors of relevant articles whose titles and  
3 abstracts meet the inclusion criteria, but whose full-text is not available in the public domain,  
4 via e-mail.  
5  
6

7  
8  
9 Studies that are irrelevant, do not include any form of measurement tools, or with tools not  
10 measuring vaccine hesitancy will be excluded.  
11  
12

### 13 **Stage 3: Study selection**

14  
15  
16 The three-step search strategy will inform the selection of studies to be included in the scoping  
17 review. All studies that meet the inclusion criteria will be imported into a reference  
18 management package (EndNote). The total number of relevant studies retrieved from the first  
19 step of the search will be recorded, as will the total number of studies retrieved from each  
20 source of information in the second step. The records will be de-duplicated and the number of  
21 duplicates removed recorded. The number of studies excluded after screening of titles,  
22 abstracts and full texts will be recorded, as will the reasons for exclusion. All this information  
23 will be presented in a PRISMA-ScR extension[42] flow diagram.  
24  
25  
26  
27  
28  
29

### 30 **Stage 4: Charting the data**

31  
32  
33 A data charting form that will provide a logical summary of information extracted from each  
34 full text article included in the study will be developed prior to the commencement of the  
35 scoping review and will be updated as necessary as the study progresses.[41] The data charting  
36 form will be designed to extract information relevant to the review question and objectives  
37 and will include, but may not be limited to: title, authors, year of publication, WHO region,  
38 country where study was conducted, type of tool, target population, vaccines investigated,  
39 domain investigated, number of constructs and total number of items. Data charting will be  
40 carried out independently in duplicate by two authors including an evidence synthesis  
41 researcher, and as with the preceding stages, other authors will be consulted to resolve  
42 differing opinions and to provide supervisory oversight.  
43  
44  
45  
46  
47  
48  
49

### 50 **Stage 5: Collating, summarizing and reporting the results**

51  
52  
53 Information from data extracted from included studies will be collated, and quantitative results  
54 presented using descriptive statistics such as percentages, tables, charts and flow diagrams as  
55 appropriate, while the qualitative results will be reported thematically. This will be followed  
56  
57  
58

1  
2 by an informed discussion based on careful consideration of the results in keeping with the  
3 purpose and objective of the review. No meta-analysis is planned for the review, neither will  
4 the quality of evidence of included studies be assessed as the purpose of the scoping review  
5 is to give a descriptive overview of currently available vaccine hesitancy measuring tools in  
6 the literature, and present a summary of their nature, similarities and differences.  
7  
8  
9

### 10 11 **Stage 6: Consultation exercise (optional step)**

12  
13 A consultation exercise is not intended for this review as its relevance to the review question  
14 and objectives is negligible. However, if in the course of the review the need for it should  
15 arise, relevant stakeholders will be consulted and the outcomes of such consultations will be  
16 reported and used to further understand and interpret the results and implications of the review.  
17  
18  
19

### 20 21 **Conclusion**

22  
23 The scoping review will, in line with its objectives, provide a broad overview of currently  
24 available vaccine hesitancy measuring tools, their similarities and differences, and highlight  
25 gaps in existing knowledge related to contextual development and validation of such tools, as  
26 well as identify areas where more research is required.  
27  
28  
29

30  
31 This is aimed at providing useful and relevant information for current and future users of such  
32 tools and helpful insights for those intending to validate such tools in any context or setting.  
33  
34

### 35 36 **ETHICS AND DISSEMINATION**

37  
38 Ethics approval is not a requirement for the review. All data will be obtained from publicly  
39 available documents, and no primary data will be generated. The scoping review forms part  
40 of the evidence synthesis phase of a doctoral research project that has obtained ethics approval  
41 from the host institution. The Project identity number is: 8945 and the Human Research Ethics  
42 Committee (HREC) reference is # S19/01/014 (PhD).  
43  
44  
45

46  
47 The review will be presented at conferences and other relevant and appropriate platforms. It  
48 will also be published in a peer-reviewed journal.  
49  
50

### 51 52 **DATA STATEMENT**

53  
54 Data generated will be published in the review, and will be publicly accessible.  
55  
56  
57  
58  
59  
60



## Author Contributions

EO led the conceptualization, design, and drafted the protocol. EDP and CSW developed the search strategy and conducted the preliminary searches; HM and CSW provided supervisory overview and feedback on the methodology and the manuscript. This team of four authors give their approval to the publishing of this protocol manuscript.

## Acknowledgements

The authors gratefully acknowledges the critical review and technical editing of the manuscript provided by Dr. A.B. Wiyeh.

## Funding

EO gratefully acknowledges the students' bursary provided by the South African Medical Research Council (SAMRC) through its' Internship Scholarship programme; and for funding the open access publication of this protocol.

## Competing interests

None declared.

## Patient consent

Not required.

## Ethics approval

Research ethics approval is not required for a scoping review.

## Provenance and peer review

Not commissioned; externally peer reviewed.

## Open access

This is an open access article distributed in accordance with the Creative Commons Attribution Non Commercial (CC BY-NC 4.0) license, which permits others to distribute, remix, adapt, build upon this work non-commercially, and license their derivative works on different terms, provided the original work is properly cited, appropriate credit is given, any changes made indicated, and the use is non-commercial. See: <http://creativecommons.org/licenses/by-nc/4.0/>.



**REFERENCES**

- [1] Ansong D, Tawfik D, Williams EA, et al. Suboptimal vaccination rates in rural Ghana despite positive caregiver attitudes towards vaccination. *J Vaccines Immun* 2014; 2: 7–15.
- [2] Ehreth J. The global value of vaccination. *Vaccine* 2003; 21: 596–600.
- [3] Burnett RJ, Larson HJ, Moloji MH, et al. Addressing public questioning and concerns about vaccination in South Africa: A guide for healthcare workers. *Vaccine* 2012; 30: 72–78.
- [4] World Health Organization. WHO vaccine-preventable diseases: monitoring system. 2004 global summary. *World health organization*.
- [5] Burton A, Monasch R, Lautenbach B, et al. WHO and UNICEF estimates of national infant immunization coverage: Methods and processes. *Bull World Health Organ* 2009; 87: 535–541.
- [6] WHO. Global immunization coverage sustained in the past five years. [https://www.who.int/immunization/newsroom/press/immunization\\_coverage\\_july\\_2016/en/](https://www.who.int/immunization/newsroom/press/immunization_coverage_july_2016/en/) (accessed 27 June 2019).
- [7] Succi RC de M. Vaccine refusal – what we need to know. *J Pediatr (Rio J)* 2018; 94: 574–581.
- [8] Global Vaccine Action Plan. *Vaccine* 2013; 31: B5–B31.
- [9] Dubè E, Laberge C, Guay M, et al. Vaccine Hesitancy. *Hum vaccines Immunother* 2013; 9: 1763–1773.
- [10] Bloom BR, Marcuse E, Mnookin S. Addressing vaccine hesitancy. *Science (80- )* 2014; 344: 339.
- [11] Dubé E. Addressing vaccine hesitancy: the crucial role of healthcare providers. *Clin Microbiol Infect* 2017; 23: 279–280.
- [12] MacDonald NE, SAGE Working Group on Vaccine Hesitancy T. Vaccine hesitancy: Definition, scope and determinants. *Vaccine* 2015; 33: 4161–4164.

- 1  
2 [13] Betsch C, Böhm R, Chapman GB. Using Behavioral Insights to Increase Vaccination  
3 Policy Effectiveness. *Policy Insights from Behav Brain Sci* 2015; 2: 61–73.  
4  
5  
6 [14] Rosselli R, Martini M, Bragazzi NL. The old and the new: Vaccine hesitancy in the  
7 era of the Web 2.0. Challenges and opportunities. *J Prev Med Hyg* 2016; 57: E47–  
8 E50.  
9  
10  
11 [15] Bloom DE. The value of vaccination. *World Econ* 2005; 6: 1–8.  
12  
13  
14 [16] Lane S, MacDonald NE, Marti M, et al. Vaccine hesitancy around the globe: Analysis  
15 of three years of WHO/UNICEF Joint Reporting Form data-2015–2017. *Vaccine*  
16 2018; 36: 3861–3867.  
17  
18  
19 [17] Siddiqui M, Salmon DA, Omer SB. Epidemiology of vaccine hesitancy in the United  
20 States. *Hum Vaccines Immunother* 2013; 9: 2643–2648.  
21  
22  
23 [18] Dasgupta P, Sharmistha Bhattacharjee Samir Dasgupta JKR, Mukherjee A, et al.  
24 Vaccine Hesitancy for Childhood Vaccinations in Slum Areas of Siliguri, India.  
25 *Indian J Public Health* 2017; 61: 199–204.  
26  
27  
28 [19] Larson HJ, de Figueiredo A, Xiahong Z, et al. The State of Vaccine Confidence 2016:  
29 Global Insights Through a 67-Country Survey. *EBioMedicine* 2016; 12: 295–301.  
30  
31  
32 [20] Njeru I, Ajack Y, Muitherero C, et al. Did the call for boycott by the catholic bishops  
33 affect the polio vaccination coverage in Kenya in 2015? A cross-sectional study. *Pan*  
34 *Afr Med J* 2016; 24: 1–9.  
35  
36  
37 [21] Zewdie A, Letebo M, Mekonnen T. Reasons for defaulting from childhood  
38 immunization program: A qualitative study from Hadiya zone, Southern Ethiopia.  
39 *BMC Public Health* 2016; 16: 1–9.  
40  
41  
42 [22] Ozawa S, Wonodi C, Babalola O, et al. Using best-worst scaling to rank factors  
43 affecting vaccination demand in northern Nigeria. *Vaccine* 2017; 35: 6429–6437.  
44  
45  
46 [23] WHO. *Report of the SAGE Working Group on Vaccine Hesitancy*.  
47 [https://www.who.int/immunization/sage/meetings/2014/october/1\\_Report\\_WORKING](https://www.who.int/immunization/sage/meetings/2014/october/1_Report_WORKING_GROUP_vaccine_hesitancy_final.pdf)  
48 [\\_GROUP\\_vaccine\\_hesitancy\\_final.pdf](https://www.who.int/immunization/sage/meetings/2014/october/1_Report_WORKING_GROUP_vaccine_hesitancy_final.pdf) (Accessed 28 June 2019). 2014. Epub ahead  
49 of print 2014. DOI: 10.4172/2155-9821.1000161.  
50  
51  
52  
53  
54  
55  
56  
57  
58  
59  
60

- 1  
2 [24] Larson HJ, Jarrett C, Eckersberger E, et al. Understanding vaccine hesitancy around  
3 vaccines and vaccination from a global perspective: A systematic review of published  
4 literature, 2007-2012. *Vaccine* 2014; 32: 2150–2159.  
5  
6  
7  
8 [25] Cooper S, Betsch C, Sambala EZ, et al. Vaccine hesitancy—a potential threat to the  
9 achievements of vaccination programmes in Africa. *Hum Vaccines Immunother* 2018;  
10 14: 2355–2357.  
11  
12  
13 [26] Betsch C, Schmid P, Heinemeier D, et al. *Beyond confidence: Development of a*  
14 *measure assessing the 5C psychological antecedents of vaccination*. 2018. Epub  
15 ahead of print 2018. DOI: 10.1371/journal.pone.0208601.  
16  
17  
18  
19 [27] Verelst F, Kessels R, Delva W, et al. Drivers of vaccine decision-making in South  
20 Africa: A discrete choice experiment. *Vaccine* 2019; 37: 2079–2089.  
21  
22  
23 [28] Keenan A, Ghebrehewet S, Vivancos R, et al. Measles outbreaks in the UK, is it  
24 when and where, rather than if? A database cohort study of childhood population  
25 susceptibility in Liverpool, UK. *BMJ Open*; 7. Epub ahead of print 2017. DOI:  
26 10.1136/bmjopen-2016-014106.  
27  
28  
29  
30  
31 [29] Callender D. Vaccine hesitancy: More than a movement. *Hum Vaccines Immunother*  
32 2016; 12: 2464–2468.  
33  
34  
35 [30] Opel DJ, Mangione-Smith R, Taylor JA, et al. Development of a survey to identify  
36 vaccine-hesitant parents. *Hum Vaccin* 2011; 7: 419–425.  
37  
38  
39 [31] Gilkey MB, Magnus BE, Reiter PL, et al. The Vaccination Confidence Scale: A brief  
40 measure of parents' vaccination beliefs. *Vaccine* 2014; 32: 6259–6265.  
41  
42  
43 [32] Gilkey MB, Reiter PL, Magnus BE, et al. Validation of the Vaccination Confidence  
44 Scale: A Brief Measure to Identify Parents at Risk for Refusing Adolescent Vaccines.  
45 *Acad Pediatr* 2016; 16: 42–49.  
46  
47  
48  
49 [33] Shapiro GK, Tatar O, Dube E, et al. The vaccine hesitancy scale: Psychometric  
50 properties and validation. *Vaccine* 2018; 36: 660–667.  
51  
52  
53 [34] Wallace AS, Wannemuehler K, Bonsu G, et al. Development of a valid and reliable  
54 scale to assess parents' beliefs and attitudes about childhood vaccines and their  
55  
56  
57  
58  
59  
60

- 1  
2 association with vaccination uptake and delay in Ghana. *Vaccine* 2019; 37: 848–856.  
3  
4 [35] Larson HJ, Jarrett C, Schulz WS, et al. Measuring vaccine hesitancy: The  
5 development of a survey tool. *Vaccine* 2015; 33: 4165–4175.  
6  
7 [36] Pham MT, Rajić A, Greig JD, et al. A scoping review of scoping reviews: Advancing  
8 the approach and enhancing the consistency. *Res Synth Methods* 2014; 5: 371–385.  
9  
10 [37] Tricco AC, Lillie E, Zarin W, et al. A scoping review on the conduct and reporting of  
11 scoping reviews. *BMC Med Res Methodol* 2016; 16: 1–10.  
12  
13 [38] Arksey H, O'Malley L. Scoping studies: Towards a methodological framework. *Int J*  
14 *Soc Res Methodol Theory Pract* 2005; 8: 19–32.  
15  
16 [39] Stenberg M, Mangrio E, Bengtsson M, et al. Formative peer assessment in healthcare  
17 education programmes: protocol for a scoping review. *BMJ Open* 2018; 8: e025055.  
18  
19 [40] Levac D, Colquhoun H, O'Brien KK. Scoping studies: advancing the methodology.  
20 *Implement Sci* 2010; 5: 69.  
21  
22 [41] The Joanna Briggs Institute. Joanna Briggs Institute Reviewers' Manual: 2015  
23 edition/supplement Methodology for JBI Scoping Reviews. *Clim Chang 2013 - Phys*  
24 *Sci Basis* 2015; 1–30.  
25  
26 [42] Tricco AC, Lillie E, Zarin W, et al. PRISMA extension for scoping reviews  
27 (PRISMA-ScR): Checklist and explanation. *Ann Intern Med* 2018; 169: 467–473.  
28  
29  
30  
31  
32  
33  
34  
35  
36  
37  
38  
39  
40  
41  
42  
43  
44  
45  
46  
47  
48  
49  
50  
51  
52  
53  
54  
55  
56  
57  
58  
59  
60

# BMJ Open

## Current tools available for investigating vaccine hesitancy: a scoping review protocol

|                                 |                                                                                                                                                                                                                                                                                                                                                                                                                                                                                                                                                                                                          |
|---------------------------------|----------------------------------------------------------------------------------------------------------------------------------------------------------------------------------------------------------------------------------------------------------------------------------------------------------------------------------------------------------------------------------------------------------------------------------------------------------------------------------------------------------------------------------------------------------------------------------------------------------|
| Journal:                        | <i>BMJ Open</i>                                                                                                                                                                                                                                                                                                                                                                                                                                                                                                                                                                                          |
| Manuscript ID                   | bmjopen-2019-033245.R1                                                                                                                                                                                                                                                                                                                                                                                                                                                                                                                                                                                   |
| Article Type:                   | Protocol                                                                                                                                                                                                                                                                                                                                                                                                                                                                                                                                                                                                 |
| Date Submitted by the Author:   | 24-Oct-2019                                                                                                                                                                                                                                                                                                                                                                                                                                                                                                                                                                                              |
| Complete List of Authors:       | Oduwole, Elizabeth; University of Stellenbosch Department of Interdisciplinary Health Sciences, Global Health; Cochrane South Africa, South African Medical Research Council<br>Pienaar, Elizabeth; Medical Research Council, South African Cochrane Centre<br>Mahomed, Hassan; University of Stellenbosch Department of Interdisciplinary Health Sciences, Global Health<br>Wiysonge, Charles; South African Medical Research Council, Cochrane South Africa; Stellenbosch University, Division of Epidemiology and Biostatistics, Department of Global Health, Faculty of Medicine and Health Sciences |
| <b>Primary Subject Heading</b>: | Public health                                                                                                                                                                                                                                                                                                                                                                                                                                                                                                                                                                                            |
| Secondary Subject Heading:      | Public health, Global health                                                                                                                                                                                                                                                                                                                                                                                                                                                                                                                                                                             |
| Keywords:                       | Vaccine hesitancy, Immunization, Vaccination, Tools, Scoping reviews, Public health < INFECTIOUS DISEASES                                                                                                                                                                                                                                                                                                                                                                                                                                                                                                |
|                                 |                                                                                                                                                                                                                                                                                                                                                                                                                                                                                                                                                                                                          |

SCHOLARONE™  
Manuscripts

# Current tools available for investigating vaccine hesitancy: a scoping review protocol

Elizabeth O. Oduwole<sup>1, 2</sup>, Elizabeth D. Pienaar<sup>2</sup>, Hassan Mahomed<sup>1</sup>, Charles S Wiysonge<sup>2, 3</sup>

<sup>1</sup> Division of Health Systems and Public Health, Department of Global Health, Faculty of Medicine and Health Sciences, Stellenbosch University, Cape Town, South Africa

<sup>2</sup> Cochrane South Africa, South African Medical Research Council, Cape Town, South Africa

<sup>3</sup> Division of Epidemiology and Biostatistics, Department of Global Health, Faculty of Medicine and Health Sciences, Stellenbosch University, Cape Town, South Africa

## Email addresses of authors:

Elizabeth O. Oduwole: [oduwoleelizabeth@gmail.com](mailto:oduwoleelizabeth@gmail.com); [oduwole@sun.ac.za](mailto:oduwole@sun.ac.za);

Elizabeth D. Pienaar: [Elizabeth.Pienaar@mrc.ac.za](mailto:Elizabeth.Pienaar@mrc.ac.za);

Hassan Mahomed: [hmahomed@sun.ac.za](mailto:hmahomed@sun.ac.za);

Charles S. Wiysonge: [Charles.Wiysonge@mrc.ac.za](mailto:Charles.Wiysonge@mrc.ac.za)

## Corresponding author

Elizabeth O. Oduwole

Physical address: Division of Health Systems and Public Health, Department of Global Health, Faculty of Medicine and Health Sciences, Stellenbosch University, Francie Van Zijl Drive, Tygerberg, 7505 Cape Town, South Africa

Telephone numbers: +27 (0) 827990866; +27219389375

Email address: [oduwoleelizabeth@gmail.com](mailto:oduwoleelizabeth@gmail.com); [oduwole@sun.ac.za](mailto:oduwole@sun.ac.za)

**Word count: 3, 843**

## ABSTRACT

### Introduction

Vaccine hesitancy, defined as the delay in acceptance or refusal of vaccination despite availability of vaccination services is responsible in part for suboptimal levels of vaccination coverage worldwide. The WHO recommends that countries incorporate plans to measure and address vaccine hesitancy into their immunization programmes. This requires that governments and health institutions be able to detect concerns about vaccination in the population and monitor changes in vaccination behaviours. To do this effectively, tools to detect and measure vaccine hesitancy are required. The purpose of this scoping review is to give a broad overview of currently available vaccine hesitancy measuring tools and present a summary of their nature, similarities and differences.

### Methods and analysis

The review will be conducted using the framework for scoping review proffered by Arksey and O'Malley. It will comply with the Preferred Reporting Items for Systematic reviews and Meta-Analyses extension for Scoping Reviews' guidelines. The broader research question of this review is: what vaccine hesitancy measuring tools are currently available?

Search strategies will be developed using controlled vocabulary and selected keywords. PubMed, Web of Science, Scopus, and reference lists of relevant publications will be searched. Titles and abstracts will be independently screened by two authors and data from full-text articles meeting the inclusion criteria will be extracted independently by two authors using a pre-tested data charting form. Discrepancies will be resolved by discussion and consensus. Results will be presented using descriptive statistics such as percentages, tables, charts and flow diagrams as appropriate. Narrative analysis will be used to summarize the findings of the review.

### Ethics and dissemination

Ethics approval is not required for the review. It will be submitted as part of a doctoral thesis, presented at conferences and published in a peer-reviewed journal.

**Registration:** <https://osf.io/x8fjk/>

## ARTICLE SUMMARY

### Strengths and limitations of this study

- The review will bring to the fore gaps that exist in the area of contextual development and validation of vaccine hesitancy measuring tools.
- The non-prescriptive study selection criteria will broaden the scope of included literature.
- Compliance with the PRISMA-ScR will enable the review to be one of its earliest use and test of impact.
- No meta-analysis is planned for this scoping review.

**Key words:** vaccine hesitancy, immunization, vaccination, tools, scoping review



## INTRODUCTION

The significant contributions of vaccination to the health and general wellbeing of the human race cannot be overemphasised. The drastic reduction in the mortality, morbidity, and disability rates due to Vaccine Preventable Diseases (VPDs) worldwide since its introduction are great testimonials to the efficacy of vaccination. It has been estimated that over 3 million deaths and 75 thousand disabilities are prevented annually by vaccination.[1] This makes it one of the most successful public health interventions of modern times.[2] The progress made in vaccination coverage over the years was further accentuated and accelerated by the introduction of the World Health Organisation's (WHO) Expanded Programme on Immunization (EPI) in 1974.[3] EPI is a resounding success in most parts of the world. The global immunization coverage (indicated by the percentage of children who has received the third dose of diphtheria, tetanus and pertussis vaccine (DTP3)[4, 5] is estimated at 86% in 2015 according to WHO and UNICEF (United Nations International Children's Emergency Funds) data on global immunization. This coverage is said to have been sustained above 85% since the year 2010.[6] To continue to be a public health success, vaccines needs to be accepted and trusted by its target populace, and broadly and adequately used.[7]

### **The global challenge of vaccine hesitancy**

The estimates reported above are calculated using the official national immunization coverage figures reported to WHO-UNICEF by member states.[4] They however, falls short of the Global Vaccine Action Plan's (GVAP's) target of 90% coverage at national level and 80% coverage at district levels for the Decade of Vaccines, that is, 2011-2020.[6, 8] Moreover, national coverage levels have been known to 'mask' variations within countries, concealing clusters of sub-national geographical or sociological areas where coverage is much lower.[5, 6] These areas with low or suboptimal vaccination coverage have provided fertile breeding grounds for intermittent outbreaks of vaccine preventable diseases in various parts of the world, including developed and developing countries.[9-11] These outbreaks have been attributed, in part, to the delay or outright refusal of some members of the population to vaccinate themselves or their children even when such services are available.

This phenomenon, that is, the delay in acceptance or refusal of vaccination despite availability of vaccination services, is defined as vaccine hesitancy.[12] Vaccine hesitancy is complex and context specific, and varies across time, place and vaccines.[12, 13] It can be described on a

1  
2 continuum ranging from those who accept all vaccines without any doubt to those who reject  
3 all without any doubt. The large, heterogeneous group of individuals between these two  
4 extremes exhibits varying degrees of ‘hesitancy’.[12] Vaccine hesitancy thus reflects the  
5 client’s disposition towards vaccination as opposed to health system factors which impede  
6 vaccine uptake. Consequently, vaccine hesitancy shifts focus from the well-researched  
7 “supply” side of vaccination to the relatively under-studied “demand” side of vaccination,  
8 exploring people’s willingness to accept vaccination for themselves or their children when  
9 supply and access are available. The extreme expression of vaccine hesitancy; vaccine refusal,  
10 is as old as the advent of vaccination itself.[9, 14, 15] Evidence suggests that it has become  
11 more pronounced on the global vaccination landscape in recent years, aided amongst other  
12 things by the increasing advancement in Information and Communication Technologies  
13 (ICTs).[3, 14]

23 Many of the countries in the world contend with vaccine hesitancy, with well over 90% of  
24 the 194 member states of the WHO reporting it over three years as against less than the 10%  
25 that reported “no hesitancy”. [16] The three year (2015-2017) analysis of WHO/UNICEF  
26 member state Joint Reporting Form (JRF) by Sarah Lane and her team also revealed that  
27 vaccine hesitancy is present in all the six WHO regions, and it cuts across all the four  
28 categories of country income levels as classified by the WHO. These are: low, lower middle,  
29 upper middle and high income category.[16] On country level, vaccine hesitancy has been  
30 identified in urban and rural dwellers,[17] as well as amongst people of low literacy and those  
31 of high literacy[18, 19] howbeit for different reasons which are beyond the scope of this  
32 review protocol to elucidate. There are documented evidence that shows that vaccine  
33 hesitancy is present amongst adherents of the two major religions of the world[20] and is not  
34 limited to either gender.[21, 22] Also, notable is the fact that vaccine hesitancy may have an  
35 inverse relationship with **vaccine confidence**, the lack of which may be regarded as one of  
36 the main determinants of vaccine hesitancy; covering issues of trust. When confidence is low  
37 or lacking, there is the tendency to be hesitant, delay or outrightly refuse vaccination.[23]

### 50 **Determinants of vaccine hesitancy**

51  
52 Determinants of vaccine hesitancy can also be referred to as factors, reasons or causes of  
53 vaccine hesitancy. According to the WHO’s Strategic Advisory Group of Experts on  
54 Immunization (SAGE) Working Group (WG) on vaccine hesitancy report of 2014,[24] there

1  
2 are myriads of factors that influences the vaccine decision-making process. This is not  
3 surprising given its complex and context specific nature. They proffered two models of  
4 vaccine hesitancy determinants; the 3C model which is a succinct, easy-to-grasp model  
5 comprising of three determinants of vaccine hesitancy all starting with the letter 'C', and the  
6 more detailed, Working Group Determinants of Vaccine Hesitancy Matrix.[12, 24, 25]  
7  
8  
9

10  
11 In the 3C model, the determinants of vaccine hesitancy are identified as: **confidence**, which  
12 covers issues of trust, not only in safety and effectiveness of vaccines, but also in the  
13 competence of the health care professionals that administer them and the health care systems  
14 that delivers them, as well as in the motives of the policy makers who proposes them.  
15 **Convenience** involves the ease or otherwise at which the vaccines and related services are  
16 accessed, their affordability and the willingness of the individuals to pay. And **complacency**,  
17 which occurs when the need to vaccinate is low because the perceived risk of vaccine  
18 preventable diseases are deemed to be low. Complacency is particularly heightened in  
19 situations where other competing health or life responsibilities are present. These tend to  
20 dwarf the need for vaccination which is seen as a preventive measure against diseases, many  
21 of which are no longer common or seen as life-threatening, ironically, due to the successes of  
22 previous vaccination endeavours.[12, 24]  
23  
24  
25  
26  
27  
28  
29  
30  
31

32  
33 In recent years, additional two 'Cs' have been proposed to expand the '3C' model to a '5C'  
34 model. These are rational **calculation** in which individuals with no strongly defined  
35 vaccination attitude embark on an intensive search for information, and depending on their  
36 findings, asses the risk of vaccination and makes a decision (usually a subjective one) either  
37 to vaccinate or not to vaccinate. **Collective** responsibility, on the other hand is implied when  
38 individuals or sub-groups makes vaccine decisions based on their sense of social  
39 responsibility. Such may decide to vaccinate themselves to protect others. For example,  
40 pregnant women deciding to take pertussis vaccines based on their understanding that the  
41 protection it offers is not for themselves but for their unborn babies.[13, 26, 27]  
42  
43  
44  
45  
46  
47  
48

49 The second model, the Working Group Determinants of Vaccine Hesitancy Matrix is more  
50 complex and detailed than the 3C model as earlier mentioned, it broadly groups the  
51 determinants under three categories. The first is **contextual influences**, the second, **individual  
52 and group influences** and the third, **vaccine and vaccination-specific issues**. Each of these  
53 categories has a number of factors listed under them that gives more details about the  
54  
55  
56  
57  
58  
59  
60

determinant and its scope.[25] Knowing the determinants of vaccine hesitancy in a particular context and setting allows for targeted interventions to be developed purposely to combat its effect in that particular context and setting; as not all intervention works in all settings at all times and for all vaccines. Most of the interventions to mitigate against vaccine hesitancy and its effects have been designed and tested in high income countries (HICs), with precious little documented in low and middle income countries (LMICs), especially in sub-Saharan Africa.

### **Effects of vaccine hesitancy**

The effects of vaccine hesitancy, that is, the delay or refusal of vaccination for one's self or ones' dependant(s) despite the availability and offer of such services can be grave and far-reaching. Vaccine hesitancy is known to have a negative effect on vaccine demand, which in turn affects vaccine uptake and consequently the level of coverage needed to contain outbreaks and maintain control of vaccine preventable diseases. Ultimately, this undermines the effectiveness and successes of immunization programs.[9]

Vaccine hesitancy does not only pose a danger to the hesitant or vaccine-refusing individuals and / or their dependants, but also to the larger society. Vaccine hesitancy reduces 'herd immunity', that is, the level at which immunization coverage is to be maintained if protection is to be offered to those too young (for example, neonates) or too sick (the immunocompromised) to be immunized.[28] These sub-group of people depend on the immunization of other people in their community to protect them from contacting some vaccine preventable diseases. The level of coverage required for herd immunity in a community to prevent an outbreak of measles is estimated at 95%. If there is a reduction in this level for a sustained period of time in a community, an outbreak measles is imminent in such a community.

Controversies based on quasi 'scientific' claims such as the one ignited by the infamous Wakefield study conducted in the UK, which suggested a direct link between the measles, mumps and rubella (MMR) vaccine and autism, resulted in wide spread vaccine hesitancy and consequent negative effects. One of such effects is the erosion of confidence in the safety of vaccines, particularly the MMR vaccine, leading to marked decrease in vaccination levels and outbreaks of measles in the UK,[29] some parts of Europe such as Austria, Germany and France,[13] and the United States.[30] Another unfortunate example of the effect of vaccine hesitancy is demonstrated in the fivefold increase in the incidence of polio cases in Nigeria

1  
2 between 2002 -2006. This was caused by the boycott of the oral polio vaccine (OPV), due to  
3 controversies emanating from unfounded rumours and distrust in the government.[26]  
4

5  
6 A lot of countries battle with the effects of vaccine hesitancy, the global influence of which  
7 prompted the WHO to recommend that it or its proxies should be constantly monitored. This  
8 necessitates the development of tools to detect and measure vaccine hesitancy.[12]  
9  
10

### 11 **Measures of vaccine hesitancy**

12  
13  
14 The menace of vaccine hesitancy and its attendant undesirable effects are a threat to public  
15 health globally. Its complex and context specific nature, and variability across time, place and  
16 vaccines makes its detection and measure somewhat challenging. There had been several  
17 efforts in recent past to develop tools for the detection and measures of vaccine hesitancy,  
18 such as Parent Attitudes about Childhood Vaccines Survey (PACV),[31] Vaccine Confidence  
19 Scale (VCS),[32, 33] Global Vaccine Confidence Index (GVCI)[19] and Vaccine Hesitancy  
20 Scale (VHS).[34] Most were developed for used in high income countries (HIC), and some,  
21 like the VHS has been validated and used in such context and settings.[34] Whilst  
22 acknowledging the work of Wallace *et al.*,[35] who recently developed and validated a tool;  
23 the Caregiver Vaccine Acceptance Scale (CVAS) in Ghana, an LMIC in sub-Saharan Africa,  
24 there is, nevertheless a dearth of such context specific tools to measure vaccine hesitancy in  
25 many other sub-Saharan LMIC context and settings. Hence there is a need for deliberate and  
26 concerted effort to fill this existing knowledge gap. As imperative this need is; care must be  
27 taken in executing this mandate to ensure that such generated tools are not just context-specific  
28 and valid, but can also provide a basis for data comparison with, and possible integration with  
29 those generated in other parts of the world. This can only be possible if similar templates are  
30 adapted and used in the development of such tools. This seems to be an implicit rationale  
31 behind the SAGE working group on vaccine hesitancy's' recommendation #1 in their full  
32 report of 2014 to WHO member states. The recommendation states that member states should  
33 "incorporate a plan to measure and address vaccine hesitancy into their country's  
34 immunization program as part of good program practices; the compendium of vaccine  
35 hesitancy survey questions may help; use of questions from the compendium facilitates inter-  
36 country comparisons, though the survey questions still remain to be validated throughout  
37 different settings".[24] This is exemplified in the effort of Wallace and his team,[35] and is  
38 the main thrust of the research project which the scoping review subsequent to this protocol  
39  
40  
41  
42  
43  
44  
45  
46  
47  
48  
49  
50  
51  
52  
53  
54  
55  
56  
57

1 aims to address. The crux of the project is to develop a context-specific validated tool in a  
2 sub-Saharan LMIC setting based on the compendium of vaccine hesitancy survey questions  
3 developed by Larson and her team in 2015[36] commissioned by the WHO. The use of the  
4 compendium questions is expected to facilitate inter-country comparisons when validated in  
5 different settings as stated in the recommendation.  
6  
7  
8  
9

## 10 **METHODS AND ANALYSIS**

11  
12  
13 The use of scoping reviews, especially in health and related fields, has steadily been on the  
14 rise since 2012.[37, 38] Scoping reviews are used to identify research gaps, map key concepts  
15 and identify main sources of evidence available in a particular area of research.[39, 40] A  
16 Scoping review is particularly useful when the area of research is a complex and  
17 heterogeneous one,[40] such as vaccine hesitancy. The complex and contextual nature of  
18 vaccine hesitancy, and its variation across time, place and vaccines makes scoping review an  
19 ideal tool for its investigation. Also, the usability of scoping reviews to capture the breadth of  
20 evidence available on a particular area of research is in alignment with the aim of this scoping  
21 review. The aim of the scoping review subsequent to this protocol is to give a broad overview  
22 of currently available vaccine hesitancy measuring tools, and present a summary of their  
23 nature, and similarities and differences. In keeping with this aim, no empirical evaluation of  
24 the tools will be conducted. However, variations in the target groups of the different tools and  
25 the types of scales used will be highlighted in the data extraction and discussion sections of  
26 the final review.  
27  
28  
29  
30  
31  
32  
33  
34  
35  
36  
37

38 The scoping review will utilise the Askey and O'Malley framework for conducting scoping  
39 reviews.[39] It will incorporate suggested improvements and recommendations by other  
40 authors such as Levac,[41] Pham[37] and the Joanna Briggs Institute's (JBI) manual for  
41 review authors[42] where appropriate. The JBI's manual for review authors stipulates the use  
42 of an a-priori protocol for scoping reviews, it also recommends that the inclusion and  
43 exclusion criteria for such reviews should clearly relate to the objectives and research  
44 questions of such reviews. This protocol is in compliance with this stipulation, and the scoping  
45 review will adopt the recommendations in the process of its conduct. The mandatory five  
46 stages of the six stage steps of the Askey and O'Malley framework will be utilised in the  
47 conduct of this scoping review, with the optional sixth stage not included. The six stages are:  
48  
49  
50  
51  
52  
53  
54  
55  
56  
57  
58  
59  
60



- 1
- 2 1. Identifying a research question;
- 3
- 4 2. Identifying relevant studies
- 5
- 6 3. Study selection
- 7
- 8 4. Charting the data
- 9
- 10 5. Collating, summarizing and reporting the result
- 11
- 12 6. Consultation exercise (optional step)
- 13
- 14
- 15

16 The sixth stage, the consultation stage, is an optional stage, though Askey and O'Malley  
17 alluded to its inclusion enhancing their scoping review.[39] The objective of this particular  
18 scoping review does not require a consultation stage.  
19  
20

### 21 **Stage 1: Identifying a research question**

22 The research question for the scoping review is an off-shoot of the broader research question  
23 for the project of which the scoping review forms part of the evidence synthesis phase. The  
24 research question is clearly articulated and focused as recommended by Levac and the JBI's  
25 manual for review authors,[40,41] and the scope of the review is indicated in the question.  
26 The review question is: **What vaccine hesitancy measuring tools are currently available?**  
27 The phrase "currently available" for the purpose of this scoping review refers to tools  
28 published in peer-reviewed journals available in the public domain from the year 2010 to date.  
29 This period includes the first nine years of the decade of vaccines which spans 2011-20.[8]  
30 Most of the tools in use were developed within this time frame, the few that might be before  
31 this period would have had their essence captured in their successors, as using an existing tool  
32 as the template for the development of a new one is a consistent method of tool development.  
33 This further clarification of the research question will also help in the development of an  
34 effective search strategy, and aid in the selection of the inclusion and exclusion criteria of  
35 retrieved records.  
36  
37  
38  
39  
40  
41  
42  
43  
44  
45  
46  
47  
48

### 49 **Stage 2: Identifying relevant studies**

50 Several bibliographic databases of peer reviewed journals will be searched, these will include,  
51 but will not be limited to; MEDLINE (PubMed), Web of Science and Scopus. The three-step  
52 search strategy recommended by the Joanna Briggs Institute's (JBI) manual for review  
53  
54  
55  
56  
57

authors[42] will be carried out in this stage. The first step includes the use of broad search terms to interrogate at least two electronic databases to retrieve relevant articles. Table 1 shows the proposed search strategy to be used to search MEDLINE. This strategy will be tailored for the other databases. The title and abstract of selected articles from this initial broad search will be scanned for key words and index terms used to describe the articles. In the second step, the key words and index terms identified in the first step will be used to develop comprehensive search strategies (search strings) using controlled vocabulary and text words. The focused search strategy, reflective of the research question, will include the use of major key words such as tools, surveys, scales, interviews and questionnaires in conjunction with the main search term ‘vaccine hesitancy’ and its variants. The search strategy will be tailored to the specifications of each of databases searched. The third and final step will include the “hand-searching” of selected relevant records to ensure comprehensive coverage of relevant and available literature. Two or more authors including a seasoned evidence synthesis researcher will be involved in this three-step search for relevant records, this process ensures the optimization of the search strategy, and will lay a solid foundation for the determination of the inclusion and exclusion criteria as well as the subsequent stages.

A preliminary search in PubMed was conducted in July 2019, using an earlier version of the search strategy shown in Table 1. During the peer review process additional search terms were included, and the updated search strategy tested in PubMed in October 2019. The expanded search strategy (tailored to each electronic database) will be used to conduct a comprehensive search of the literature for the scoping review in January – February 2020.

Table 1: Proposed search strategy to search MEDLINE (PubMed)

|    | <b>Search terms</b>                                                                                                                                                                                                                                                                                                                                                                  |
|----|--------------------------------------------------------------------------------------------------------------------------------------------------------------------------------------------------------------------------------------------------------------------------------------------------------------------------------------------------------------------------------------|
| #1 | (Vaccination Refusal) OR (Vaccine refusal) OR (Anti Vaccination Movement) OR (Vaccine hesitant) OR (vaccination hesitant) OR (Vaccine hesitancy) OR (vaccination hesitancy) OR (immunization hesitancy) OR (immunization hesitant) OR (immunization refusal) OR (immunisation hesitancy) OR (immunisation hesitant) OR (immunisation refusal) OR (vaccine avoidance) OR (vaccination |



|    |                                                                                                                                                                                            |
|----|--------------------------------------------------------------------------------------------------------------------------------------------------------------------------------------------|
|    | avoidance) OR (vaccine resistance) OR (vaccination resistance) OR (immunization avoidance) OR (immunization resistance) OR (vaccine waiver) OR (mandatory vaccination)                     |
| #2 | "Pro-vaccination" OR "Vaccination acceptance" OR "vaccine acceptance" OR "Immunization acceptance" OR "Pro-vaccine" OR "Vaccine confidence" OR "Vaccination confidence"                    |
| #3 | #1 OR #2                                                                                                                                                                                   |
| #4 | "measurement tools" OR Surveys OR Questionnaire OR Questionnaires OR Interviews OR tool OR tools OR measure OR measures OR measurements OR survey OR interview OR scales OR scale OR index |
| #5 | #3 AND #4                                                                                                                                                                                  |

**Inclusion and exclusion criteria:** All relevant studies recovered from the comprehensive search irrespective of study design, country of origin, purpose, vaccines, and target populace (e.g. population sub-sets of all demographic strata) covered will be included. Though the search strategy will be filtered to focus on studies available from the year 2010 as earlier indicated, it will also be expanded to include relevant studies that may be available before that time period, and any retrieved record will be reported. Efforts will be made to contact authors of relevant articles whose titles and abstracts meet the inclusion criteria, but whose full-text is not available in the public domain, via e-mail.

Studies that are irrelevant, not published in English, do not include any form of measurement tools, or with tools not measuring vaccine hesitancy will be excluded.

### Stage 3: Study selection

The three-step search strategy will inform the selection of studies to be included in the scoping review. All studies that meet the inclusion criteria will be imported into a reference management package (EndNote). The total number of relevant studies retrieved from the first step of the search will be recorded, as will the total number of studies retrieved from each source of information in the second step. The records will be de-duplicated and the number of duplicates removed recorded. The number of studies excluded after screening of titles, abstracts and full texts will be recorded, as will the reasons for exclusion. This information

1  
2 will be presented in a PRISMA flow diagram, a schematic draft of which is presented as figure  
3  
4 1 as recommended in the PRISMA-ScR extension checklist.[43]  
5

#### 6 **Stage 4: Charting the data**

7

8 A data charting form that will provide a logical summary of information extracted from each  
9 full text article included in the study will be developed prior to the commencement of the  
10 scoping review and will be updated as necessary as the study progresses.[42] The data charting  
11 form will be designed to extract information relevant to the review question and objectives,  
12 and will include, but may not be limited to: title, authors, year of publication, WHO region,  
13 country where study was conducted, type of tool, target population, vaccines investigated,  
14 domain investigated, number of constructs and total number of items. Data charting will be  
15 carried out independently in duplicate by two authors including an evidence synthesis  
16 researcher, and as with the preceding stages, other authors will be consulted to resolve  
17 differing opinions and to provide supervisory oversight. Below is the tentative list of fields to  
18 be completed in the data charting form:  
19  
20  
21  
22  
23  
24  
25  
26  
27

28 First author, Title, Journal name, Year of publication, Name of measure/tool, Study type,  
29 Country, WHO region, World Bank economic classification, Target population, Vaccine(s)  
30 investigated, Total number of items, Subscales, Construct/or domains investigated, Method  
31 of data collection, Validation tests, Item generation process, Study limitations, Other  
32 important information.  
33  
34  
35  
36  
37  
38  
39

#### 40 **Stage 5: Collating, summarizing and reporting the results**

41

42 Information from data extracted from included studies will be collated, and quantitative results  
43 presented using descriptive statistics such as percentages, tables, charts and flow diagrams as  
44 appropriate, while the qualitative results will be reported thematically. This will be followed  
45 by an informed discussion based on careful consideration of the results in keeping with the  
46 purpose and objective of the review. No meta-analysis is planned for the review, neither will  
47 the quality of evidence of included studies be assessed as the purpose of the scoping review  
48 is to give a descriptive overview of currently available vaccine hesitancy measuring tools in  
49 the literature, and present a summary of their nature, similarities and differences. Therefore,  
50  
51  
52  
53  
54  
55  
56  
57  
58  
59  
60

1  
2 the findings of the review will be reported as described above, and no empirical evaluation of  
3 the tools will be conducted in keeping with this aim of the review.  
4  
5  
6  
7

### 8 **Stage 6: Consultation exercise (optional step)**

9  
10 A consultation exercise is not intended for this review as its relevance to the review question  
11 and objectives is negligible. Therefore, none will be conducted.  
12  
13  
14  
15

## 16 **ETHICS AND DISSEMINATION**

17  
18  
19 Ethics approval is not a requirement for the review. All data will be obtained from publicly  
20 available documents, and no primary data will be generated. The scoping review forms part  
21 of the evidence synthesis phase of a doctoral research project that has obtained ethics approval  
22 from the Stellenbosch University Human Research Ethics Committee (reference number  
23 S19/01/014 (PhD)).  
24  
25  
26  
27  
28

29 The review will be presented at conferences and other relevant and appropriate platforms. It  
30 will also be published in a peer-reviewed journal.  
31  
32

## 33 **DATA STATEMENT**

34  
35 Data generated will be published in the review and will be publicly accessible.  
36  
37

### 38 **Author contributions**

39  
40 EO led the conceptualization, design, and drafted the protocol. EDP and CSW developed the  
41 search strategy and EDP conducted the preliminary searches; HM and CSW provided  
42 supervisory overview and feedback on the methodology and the manuscript. This team of four  
43 authors give their approval to the publishing of this protocol manuscript.  
44  
45  
46

### 47 **Acknowledgements**

48  
49 The authors gratefully acknowledge the critical review and technical editing of the manuscript  
50 provided by Dr. A.B. Wiyeh.  
51  
52  
53

### 54 **Funding**

EO gratefully acknowledges the students' bursary provided by the South African Medical Research Council (SAMRC) through its' Internship Scholarship programme; and for funding the open access publication of this protocol.

### **Competing interests**

None declared.

### **Patient consent**

Not required.

### **Patient and public involvement**

Patients and the public will not be involved in the review

### **Ethics approval**

Research ethics approval is not required for a scoping review.

### **Provenance and peer review**

Not commissioned; externally peer reviewed.

### **Open access**

This is an open access article distributed in accordance with the Creative Commons Attribution Non Commercial (CC BY-NC 4.0) license, which permits others to distribute, remix, adapt, build upon this work non-commercially, and license their derivative works on different terms, provided the original work is properly cited, appropriate credit is given, any changes made indicated, and the use is non-commercial. See: <http://creativecommons.org/licenses/by-nc/4.0/>.

### **Figure 1: PRISMA flow diagram**

1  
2  
3  
4  
5  
6  
7  
8  
9  
10  
11  
12  
13  
14  
15  
16  
17  
18  
19  
20  
21  
22  
23  
24  
25  
26  
27  
28  
29  
30  
31  
32  
33  
34  
35  
36  
37  
38  
39  
40  
41  
42  
43  
44  
45  
46  
47  
48  
49  
50  
51  
52  
53  
54  
55  
56  
57  
58  
59  
60  
**REFERENCES**

- [1] Ansong D, Tawfik D, Williams EA, et al. Suboptimal vaccination rates in rural Ghana despite positive caregiver attitudes towards vaccination. *J Vaccines Immun* 2014; 2: 7–15.
- [2] Ehreth J. The global value of vaccination. *Vaccine* 2003; 21: 596–600.
- [3] Burnett RJ, Larson HJ, Moloji MH, et al. Addressing public questioning and concerns about vaccination in South Africa: A guide for healthcare workers. *Vaccine* 2012; 30: 72–78.
- [4] World Health Organization. WHO vaccine-preventable diseases: monitoring system. 2004 global summary. *World health organization*.
- [5] Burton A, Monasch R, Lautenbach B, et al. WHO and UNICEF estimates of national infant immunization coverage: Methods and processes. *Bull World Health Organ* 2009; 87: 535–541.
- [6] WHO. Global immunization coverage sustained in the past five years. [https://www.who.int/immunization/newsroom/press/immunization\\_coverage\\_july\\_2016/en/](https://www.who.int/immunization/newsroom/press/immunization_coverage_july_2016/en/) (accessed 27 June 2019).
- [7] Succi RC de M. Vaccine refusal – what we need to know. *J Pediatr (Rio J)* 2018; 94: 574–581.
- [8] Global Vaccine Action Plan. *Vaccine* 2013; 31: B5–B31.
- [9] Dubè E, Laberge C, Guay M, et al. Vaccine Hesitancy. *Hum vaccines Immunother* 2013; 9: 1763–1773.
- [10] Bloom BR, Marcuse E, Mnookin S. Addressing vaccine hesitancy. *Science (80- )* 2014; 344: 339.
- [11] Dubé E. Addressing vaccine hesitancy: the crucial role of healthcare providers. *Clin Microbiol Infect* 2017; 23: 279–280.
- [12] MacDonald NE, SAGE Working Group on Vaccine Hesitancy T. Vaccine hesitancy: Definition, scope and determinants. *Vaccine* 2015; 33: 4161–4164.

- 1  
2 [13] Betsch C, Böhm R, Chapman GB. Using Behavioral Insights to Increase Vaccination  
3 Policy Effectiveness. *Policy Insights from Behav Brain Sci* 2015; 2: 61–73.  
4  
5  
6 [14] Rosselli R, Martini M, Bragazzi NL. The old and the new: Vaccine hesitancy in the  
7 era of the Web 2.0. Challenges and opportunities. *J Prev Med Hyg* 2016; 57: E47–  
8 E50.  
9  
10  
11 [15] Bloom DE. The value of vaccination. *World Econ* 2005; 6: 1–8.  
12  
13  
14 [16] Lane S, MacDonald NE, Marti M, et al. Vaccine hesitancy around the globe: Analysis  
15 of three years of WHO/UNICEF Joint Reporting Form data-2015–2017. *Vaccine*  
16 2018; 36: 3861–3867.  
17  
18  
19 [17] Siddiqui M, Salmon DA, Omer SB. Epidemiology of vaccine hesitancy in the United  
20 States. *Hum Vaccines Immunother* 2013; 9: 2643–2648.  
21  
22  
23 [18] Dasgupta P, Sharmistha Bhattacharjee Samir Dasgupta JKR, Mukherjee A, et al.  
24 Vaccine Hesitancy for Childhood Vaccinations in Slum Areas of Siliguri, India.  
25 *Indian J Public Health* 2017; 61: 199–204.  
26  
27  
28 [19] Larson HJ, de Figueiredo A, Xiahong Z, et al. The State of Vaccine Confidence 2016:  
29 Global Insights Through a 67-Country Survey. *EBioMedicine* 2016; 12: 295–301.  
30  
31  
32 [20] Njeru I, Ajack Y, Muitherero C, et al. Did the call for boycott by the catholic bishops  
33 affect the polio vaccination coverage in Kenya in 2015? A cross-sectional study. *Pan*  
34 *Afr Med J* 2016; 24: 1–9.  
35  
36  
37 [21] Zewdie A, Letebo M, Mekonnen T. Reasons for defaulting from childhood  
38 immunization program: A qualitative study from Hadiya zone, Southern Ethiopia.  
39 *BMC Public Health* 2016; 16: 1–9.  
40  
41  
42 [22] Ozawa S, Wonodi C, Babalola O, et al. Using best-worst scaling to rank factors  
43 affecting vaccination demand in northern Nigeria. *Vaccine* 2017; 35: 6429–6437.  
44  
45  
46 [23] Orenstein WA, Gellin BG, Beigi RH, et al. Assessing the state of vaccine confidence  
47 in the United States: Recommendations from the national vaccine advisory  
48 committee. *Public Health Rep* 2015; 130: 573–595.  
49  
50  
51 [24] WHO. *Report of the SAGE Working Group on Vaccine Hesitancy*.  
52  
53  
54  
55  
56  
57  
58  
59  
60

- 1  
2 [https://www.who.int/immunization/sage/meetings/2014/october/1\\_Report\\_WORKING](https://www.who.int/immunization/sage/meetings/2014/october/1_Report_WORKING)  
3 [\\_GROUP\\_vaccine\\_hesitancy\\_final.pdf](#) (Accessed 28 June 2019). 2014. Epub ahead  
4 of print 2014. DOI: 10.4172/2155-9821.1000161.  
5  
6  
7  
8 [25] Larson HJ, Jarrett C, Eckersberger E, et al. Understanding vaccine hesitancy around  
9 vaccines and vaccination from a global perspective: A systematic review of published  
10 literature, 2007-2012. *Vaccine* 2014; 32: 2150–2159.  
11  
12  
13 [26] Cooper S, Betsch C, Sambala EZ, et al. Vaccine hesitancy—a potential threat to the  
14 achievements of vaccination programmes in Africa. *Hum Vaccines Immunother* 2018;  
15 14: 2355–2357.  
16  
17  
18 [27] Betsch C, Schmid P, Heinemeier D, et al. *Beyond confidence: Development of a*  
19 *measure assessing the 5C psychological antecedents of vaccination*. 2018. Epub  
20 ahead of print 2018. DOI: 10.1371/journal.pone.0208601.  
21  
22  
23 [28] Verelst F, Kessels R, Delva W, et al. Drivers of vaccine decision-making in South  
24 Africa: A discrete choice experiment. *Vaccine* 2019; 37: 2079–2089.  
25  
26  
27 [29] Keenan A, Ghebrehewet S, Vivancos R, et al. Measles outbreaks in the UK, is it  
28 when and where, rather than if? A database cohort study of childhood population  
29 susceptibility in Liverpool, UK. *BMJ Open*; 7. Epub ahead of print 2017. DOI:  
30 10.1136/bmjopen-2016-014106.  
31  
32  
33 [30] Callender D. Vaccine hesitancy: More than a movement. *Hum Vaccines Immunother*  
34 2016; 12: 2464–2468.  
35  
36  
37 [31] Opel DJ, Mangione-Smith R, Taylor JA, et al. Development of a survey to identify  
38 vaccine-hesitant parents. *Hum Vaccin* 2011; 7: 419–425.  
39  
40  
41 [32] Gilkey MB, Magnus BE, Reiter PL, et al. The Vaccination Confidence Scale: A brief  
42 measure of parents' vaccination beliefs. *Vaccine* 2014; 32: 6259–6265.  
43  
44  
45 [33] Gilkey MB, Reiter PL, Magnus BE, et al. Validation of the Vaccination Confidence  
46 Scale: A Brief Measure to Identify Parents at Risk for Refusing Adolescent Vaccines.  
47 *Acad Pediatr* 2016; 16: 42–49.  
48  
49  
50 [34] Shapiro GK, Tatar O, Dube E, et al. The vaccine hesitancy scale: Psychometric  
51  
52  
53  
54  
55  
56  
57  
58  
59  
60

- 1  
2 properties and validation. *Vaccine* 2018; 36: 660–667.  
3
- 4 [35] Wallace AS, Wannemuehler K, Bonsu G, et al. Development of a valid and reliable  
5 scale to assess parents' beliefs and attitudes about childhood vaccines and their  
6 association with vaccination uptake and delay in Ghana. *Vaccine* 2019; 37: 848–856.  
7  
8  
9
- 10 [36] Larson HJ, Jarrett C, Schulz WS, et al. Measuring vaccine hesitancy: The  
11 development of a survey tool. *Vaccine* 2015; 33: 4165–4175.  
12  
13
- 14 [37] Pham MT, Rajić A, Greig JD, et al. A scoping review of scoping reviews: Advancing  
15 the approach and enhancing the consistency. *Res Synth Methods* 2014; 5: 371–385.  
16  
17
- 18 [38] Tricco AC, Lillie E, Zarin W, et al. A scoping review on the conduct and reporting of  
19 scoping reviews. *BMC Med Res Methodol* 2016; 16: 1–10.  
20  
21
- 22 [39] Arksey H, O'Malley L. Scoping studies: Towards a methodological framework. *Int J*  
23 *Soc Res Methodol Theory Pract* 2005; 8: 19–32.  
24  
25
- 26 [40] Stenberg M, Mangrio E, Bengtsson M, et al. Formative peer assessment in healthcare  
27 education programmes: protocol for a scoping review. *BMJ Open* 2018; 8: e025055.  
28  
29
- 30 [41] Levac D, Colquhoun H, O'Brien KK. Scoping studies: advancing the methodology.  
31 *Implement Sci* 2010; 5: 69.  
32  
33
- 34 [42] The Joanna Briggs Institute. Joanna Briggs Institute Reviewers' Manual: 2015  
35 edition/supplement Methodology for JBI Scoping Reviews. *Clim Chang 2013 - Phys*  
36 *Sci Basis* 2015; 1–30.  
37  
38  
39
- 40 [43] Tricco AC, Lillie E, Zarin W, et al. PRISMA extension for scoping reviews  
41 (PRISMA-ScR): Checklist and explanation. *Ann Intern Med* 2018; 169: 467–473.  
42  
43  
44  
45  
46  
47  
48  
49  
50  
51  
52  
53  
54  
55  
56  
57  
58  
59  
60



Figure 1: PRISMA flow diagram

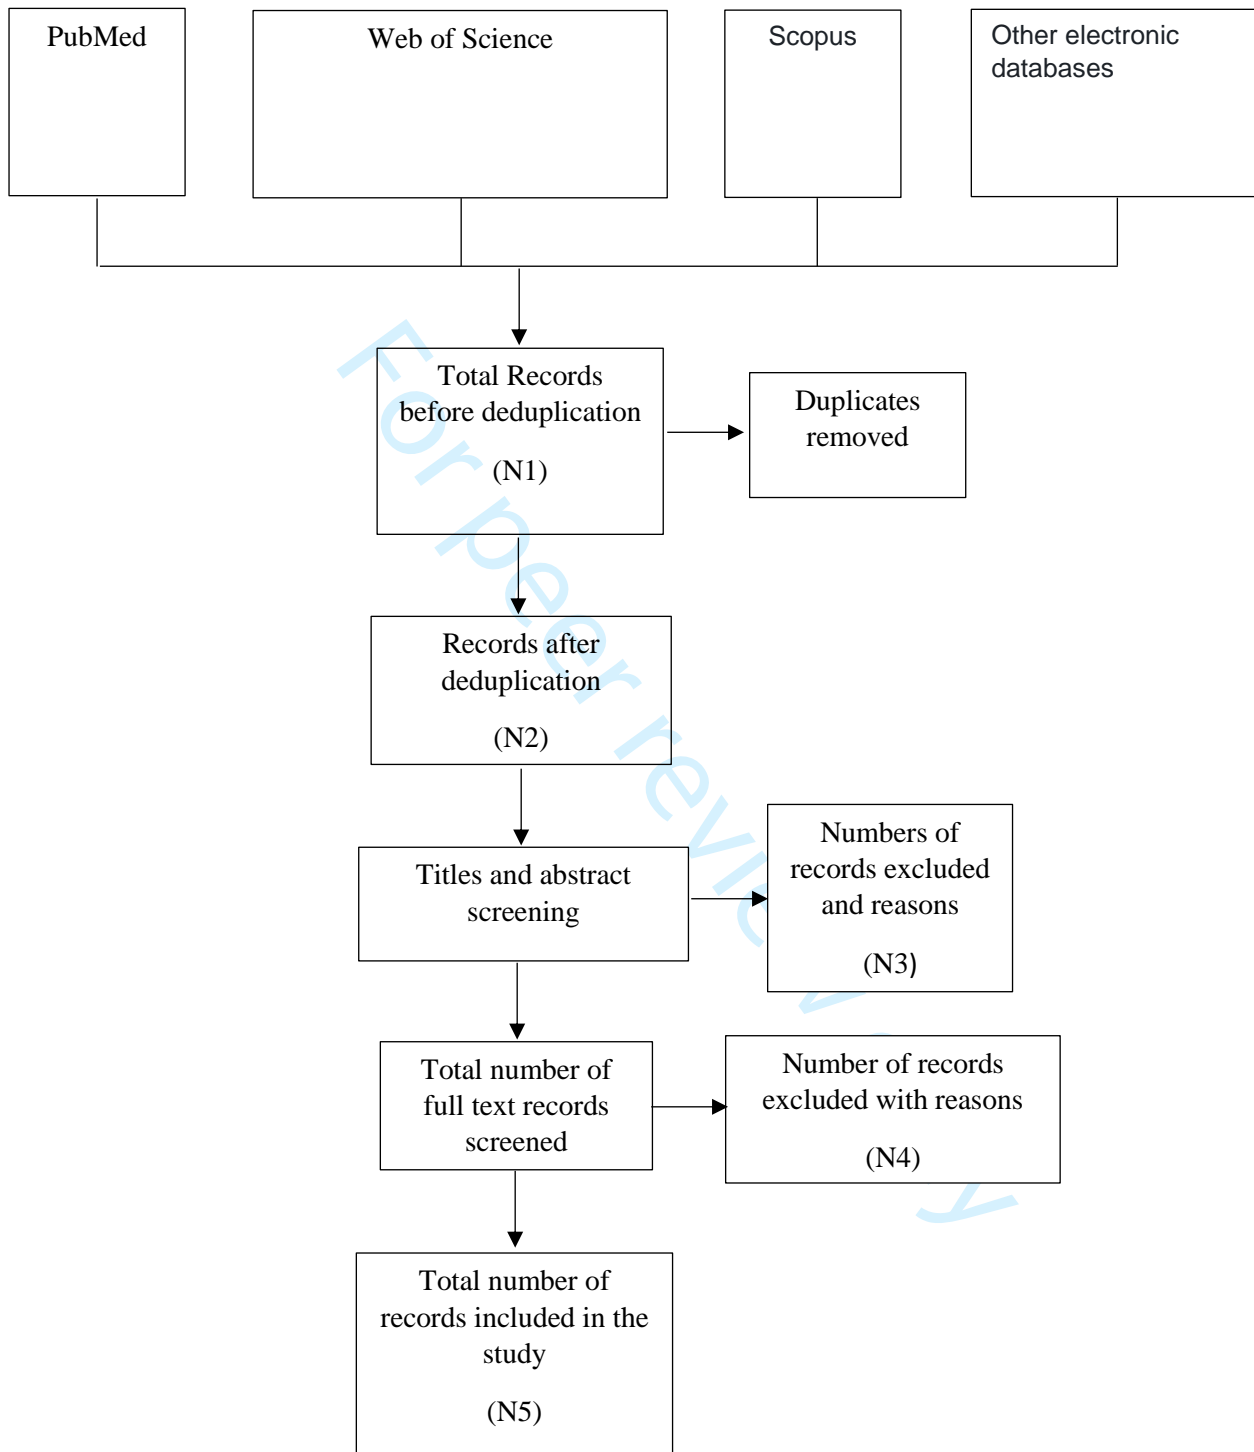

Supplement: bmjopen-2019-033245.draft_revisions.pdf [file bmjopen-2019-033245.draft_revisions.pdf]
